# Supplementary material for: Characterization of Vaginal Microbiota in Women With Recurrent Spontaneous Abortion That Can Be Modified by Drug Treatment
Source: PubMed Central journal article supplement (PMC8417370; doi:10.3389/fcimb.2021.680643), 2021-08-19
Supplement: DataSheet_1.pdf [file DataSheet_1.pdf]

**Supplementary Table 1.** Comparison of the relative abundances at the genus level between the no-medication and control groups.

| Genus                                                  | NM group (n=65)<br>Relative abundance<br>(%) | Control group (n=18)<br>Relative abundance<br>(%) | P-value |
|--------------------------------------------------------|----------------------------------------------|---------------------------------------------------|---------|
| <i>Megasphaera</i>                                     | 0.835±2.803                                  | 0±0                                               | 0.013   |
| <i>Sneathia</i>                                        | 0.572±2.144                                  | 0±0                                               | 0.051   |
| <i>Gemella</i>                                         | 0.017±0.062                                  | 0±0                                               | 0.078   |
| <i>Rhodococcus</i>                                     | 0.050±0.165                                  | 0.137±0.311                                       | 0.012   |
| <i>Burkholderia–Caballeroni<br/>a–Paraburkholderia</i> | 0.005±0.014                                  | 0.285±1.164                                       | 0.000   |
| <i>Pseudomonas</i>                                     | 0.022±0.110                                  | 1.961±8.312                                       | 0.032   |
| <i>Bacteria_unclassified</i>                           | 0.015±0.033                                  | 0.038±0.054                                       | 0.007   |
| <i>Sphingomonas</i>                                    | 0.012±0.056                                  | 0.014±0.023                                       | 0.003   |
| <i>Corynebacterium_1</i>                               | 0.003±0.004                                  | 0.002±0.008                                       | 0.038   |
| <i>Staphylococcus</i>                                  | 0.001±0.003                                  | 0.049±0.193                                       | 0.029   |
| <i>Sediminibacterium</i>                               | 0±0.002                                      | 0.004±0.009                                       | 0.001   |
| <i>Pelomonas</i>                                       | 0±0.000                                      | 0.007±0.022                                       | 0.049   |
| <i>Cutibacterium</i>                                   | 0±0                                          | 0.002±0.005                                       | 0.016   |
| <i>0319–6G20_norank</i>                                | 0±0                                          | 0.001±0.004                                       | 0.031   |
| <i>BD7–11_norank</i>                                   | 0±0                                          | 0.002±0.006                                       | 0.001   |
| <i>Obscuribacterales_norank</i>                        | 0±0                                          | 0±0.002                                           | 0.007   |
| <i>Sulfuritalea</i>                                    | 0±0                                          | 0±0.002                                           | 0.009   |

NM, no medication.
