# Supplementary material for: Characterization of Vaginal Microbiota in Women With Recurrent Spontaneous Abortion That Can Be Modified by Drug Treatment
Source: PubMed Central journal article supplement (PMC8417370; doi:10.3389/fcimb.2021.680643), 2021-08-19
Supplement: DataSheet_2.pdf [file DataSheet_2.pdf]

**Supplementary Table 2.** Comparison of the relative abundances of *Sneathia* species between the no-medication, drug-treatment and control

groups.

| Genus                        | NM<br>group (n=65)<br>Relative<br>abundance (%) | DT group<br>(n=43)<br>Relative<br>abundance<br>(%) | Control<br>group(n=18)<br>Relative<br>abundance<br>(%) | P value   |                      |                   |
|------------------------------|-------------------------------------------------|----------------------------------------------------|--------------------------------------------------------|-----------|----------------------|-------------------|
|                              |                                                 |                                                    |                                                        | NM vs. DT | NM<br>Control<br>vs. | DT vs.<br>Control |
| <i>Sneathia sanguinegens</i> | 0.564±2.115                                     | 0.396±2.044                                        | 0±0                                                    | 0.674     | 0.051                | 0.072             |
| <i>Sneathia amnii</i>        | 0.009±<br>0.046                                 | 0.011±<br>0.051                                    | 0±0                                                    | 0.970     | 0.184                | 0.185             |

NM, no medication; DT, drug treatment.
