# Supplementary material for: Characterization of Vaginal Microbiota in Women With Recurrent Spontaneous Abortion That Can Be Modified by Drug Treatment
Source: PubMed Central journal article supplement (PMC8417370; doi:10.3389/fcimb.2021.680643), 2021-08-19
Supplement: DataSheet_3.pdf [file DataSheet_3.pdf]

**Supplementary Table 3.** Comparison of the relative abundance at the genus level between the drug-treatment and control groups.

| Genus                                                  | DT group (n=43)<br>Relative abundance<br>(%) | Control group (n=18)<br>Relative abundance<br>(%) | P-value |
|--------------------------------------------------------|----------------------------------------------|---------------------------------------------------|---------|
| <i>Lactobacillus</i>                                   | 82.924±35.794                                | 70.896±38.941                                     | 0.051   |
| <i>Rhodococcus</i>                                     | 0.030±0.069                                  | 0.137±0.311                                       | 0.028   |
| <i>Burkholderia–Caballeronia–P<br/>araburkholderia</i> | 0.003±0.005                                  | 0.285±1.164                                       | 0.001   |
| <i>Bacteria_unclassified</i>                           | 0.011±0.022                                  | 0.038±0.054                                       | 0.003   |
| <i>Staphylococcus</i>                                  | 0.000±0.001                                  | 0.049±0.193                                       | 0.005   |
| <i>Pelomonas</i>                                       | 0.000±0.000                                  | 0.006±0.022                                       | 0.006   |
| <i>Sphingomonas</i>                                    | 0.005±0.020                                  | 0.014±0.023                                       | 0.001   |
| <i>Chitinophagaceae_uncultured</i>                     | 0.000±0.000                                  | 0.004±0.013                                       | 0.008   |
| <i>Sediminibacterium</i>                               | 0.000±0.000                                  | 0.003±0.008                                       | 0.001   |
| <i>Corynebacterium_1</i>                               | 0.000±0.002                                  | 0.003±0.004                                       | 0.024   |
| <i>env.OPS_17_norank</i>                               | 0.000±0.000                                  | 0.002±0.008                                       | 0.009   |
| <i>Bradyrhizobium</i>                                  | 0.000±0.000                                  | 0.002±0.008                                       | 0.034   |
| <i>Cutibacterium</i>                                   | 0±0                                          | 0.002±0.004                                       | 0.000   |
| <i>BD7-11_norank</i>                                   | 0±0                                          | 0.002±0.005                                       | 0.001   |
| <i>Corynebacterium</i>                                 | 0.000±0.000                                  | 0.001±0.005                                       | 0.038   |
| <i>0319-6G20_norank</i>                                | 0±0                                          | 0.001±0.004                                       | 0.006   |
| <i>Mycoplasma</i>                                      | 0±0                                          | 0.001±0.004                                       | 0.027   |
| <i>Bacteroides</i>                                     | 0.000±0.000                                  | 0.001±0.002                                       | 0.034   |
| <i>Bdellovibrio</i>                                    | 0±0                                          | 0.000±0.003                                       | 0.027   |
| <i>Obscuribacterales_norank</i>                        | 0.000±0.000                                  | 0.000±0.002                                       | 0.027   |
| <i>Blautia</i>                                         | 0±0                                          | 0.000±0.001                                       | 0.027   |
| <i>Parvimonas</i>                                      | 0.000±0.000                                  | 0.000±0.001                                       | 0.027   |
| <i>Negativicoccus</i>                                  | 0±0                                          | 0.000±0.001                                       | 0.027   |
| <i>Rhodocyclaceae_unclassified</i>                     | 0±0                                          | 0.000±0.001                                       | 0.027   |

DT, drug treatment.
