# Supplementary material for: Characterization of Vaginal Microbiota in Women With Recurrent Spontaneous Abortion That Can Be Modified by Drug Treatment
Source: PubMed Central journal article supplement (PMC8417370; doi:10.3389/fcimb.2021.680643), 2021-08-19
Supplement: DataSheet_4.pdf [file DataSheet_4.pdf]

**Supplementary Table 4.** Relative abundance of genera discovered in samples that were significantly different between the no-medication and drug treatment groups at the genus level.

| Genus                              | NM group (n=65)<br>Relative abundance (%) | DT group (n=43)<br>Relative abundance (%) | P-value |
|------------------------------------|-------------------------------------------|-------------------------------------------|---------|
| <i>Megasphaera</i>                 | 0.835±2.804                               | 0.386±2.391                               | 0.042   |
| <i>DNF00809</i>                    | 0.199±0.945                               | 0.001± 0.004                              | 0.021   |
| <i>Parvimonas</i>                  | 0.052±0.210                               | 0±0                                       | 0.004   |
| <i>Gemella</i>                     | 0.017±0.062                               | 0±0.001                                   | 0.026   |
| <i>Mycoplasma</i>                  | 0.002± 0.008                              | 0±0                                       | 0.017   |
| <i>Actinobacteria_unclassified</i> | 0.002± 0.008                              | 0±0                                       | 0.041   |
| <i>Mobiluncus</i>                  | 0.002± 0.005                              | 0±0.005                                   | 0.047   |
| <i>Blautia</i>                     | 0±0.001                                   | 0±0                                       | 0.041   |
| <i>Cloacibacterium</i>             | 0±0.001                                   | 0±0                                       | 0.031   |

NM, no medication; DT, drug treatment.
