# Supplementary material for: Characterization of Vaginal Microbiota in Women With Recurrent Spontaneous Abortion That Can Be Modified by Drug Treatment
Source: PubMed Central journal article supplement (PMC8417370; doi:10.3389/fcimb.2021.680643), 2021-08-19
Supplement: DataSheet_5.pdf [file DataSheet_5.pdf]

**Supplementary Table 5.** Relative abundance of genera discovered in the samples that were significantly different between the metformin plus aspirin and control groups.

| Genus                        | Metformin combined<br>with aspirin group (n=9)<br>Relative abundance (%) | Control group (n=18)<br>Relative abundance (%) | P-value |
|------------------------------|--------------------------------------------------------------------------|------------------------------------------------|---------|
| <i>Lactobacillus</i>         | 88.610±33.229                                                            | 70.896±38.941                                  | 0.042   |
| <i>Aeromonas</i>             | 0.003± 0.006                                                             | 0                                              | 0.010   |
| <i>Megasphaera</i>           | 0.002± 0.005                                                             | 0                                              | 0.041   |
| <i>Bacteria_unclassified</i> | 0.003±0.004                                                              | 0.038±0.054                                    | 0.009   |
| <i>Streptococcus</i>         | 0±0                                                                      | 2.499±0.026                                    | 0.013   |
| <i>Sphingomonas</i>          | 0.000±0.000                                                              | 0.014±0.023                                    | 0.003   |
| <i>Corynebacterium</i>       | 0.000±0.000                                                              | 0.003±0.004                                    | 0.047   |
