# Supplementary material for: Characterization of Vaginal Microbiota in Women With Recurrent Spontaneous Abortion That Can Be Modified by Drug Treatment
Source: PubMed Central journal article supplement (PMC8417370; doi:10.3389/fcimb.2021.680643), 2021-08-19
Supplement: DataSheet_6.pdf [file DataSheet_6.pdf]

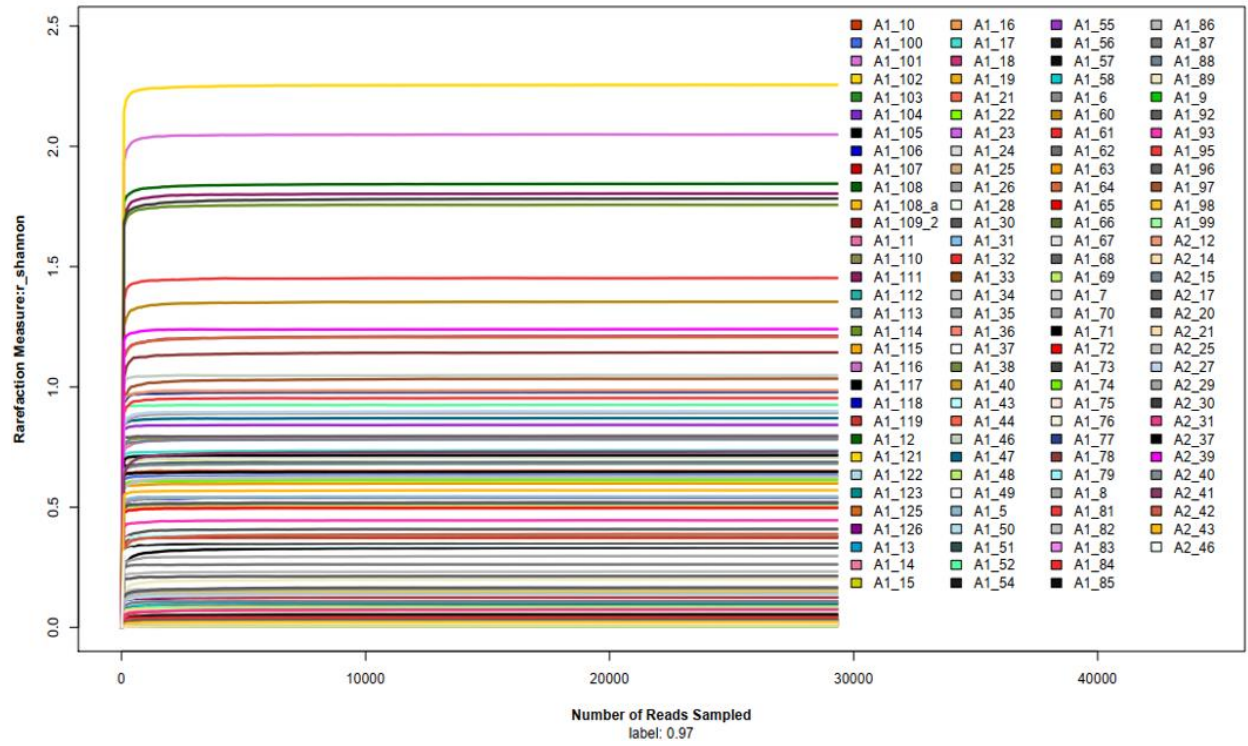

**Figure S1** Shannon-Wiener curves of all samples. The horizontal axis represents the number of reads sampled, and the vertical axis represents the Shannon index. Each color represents a sample.
